# Supplementary material for: Dynamic chromatin targeting of BRD4 stimulates cardiac fibroblast activation
Source: bioRxiv or medRxiv preprint supplement (doi:10.1101/563445), 2019-02-28
Supplement: Supplementary file [file media-1.pdf]

# sFigure 1

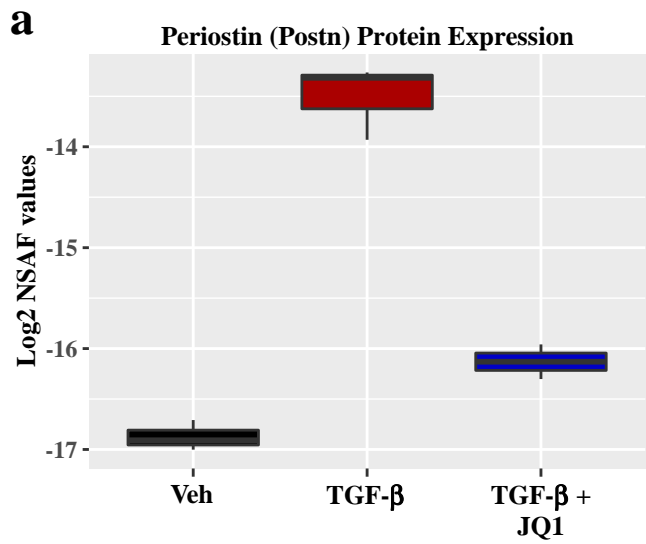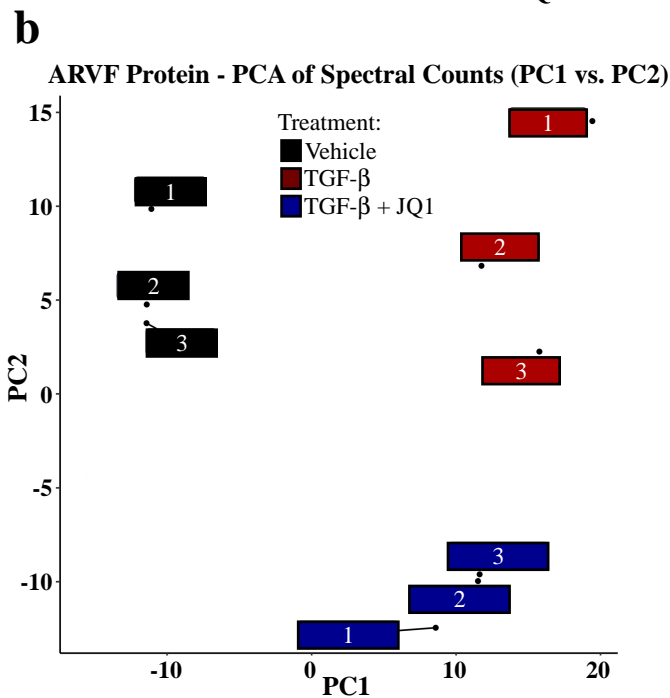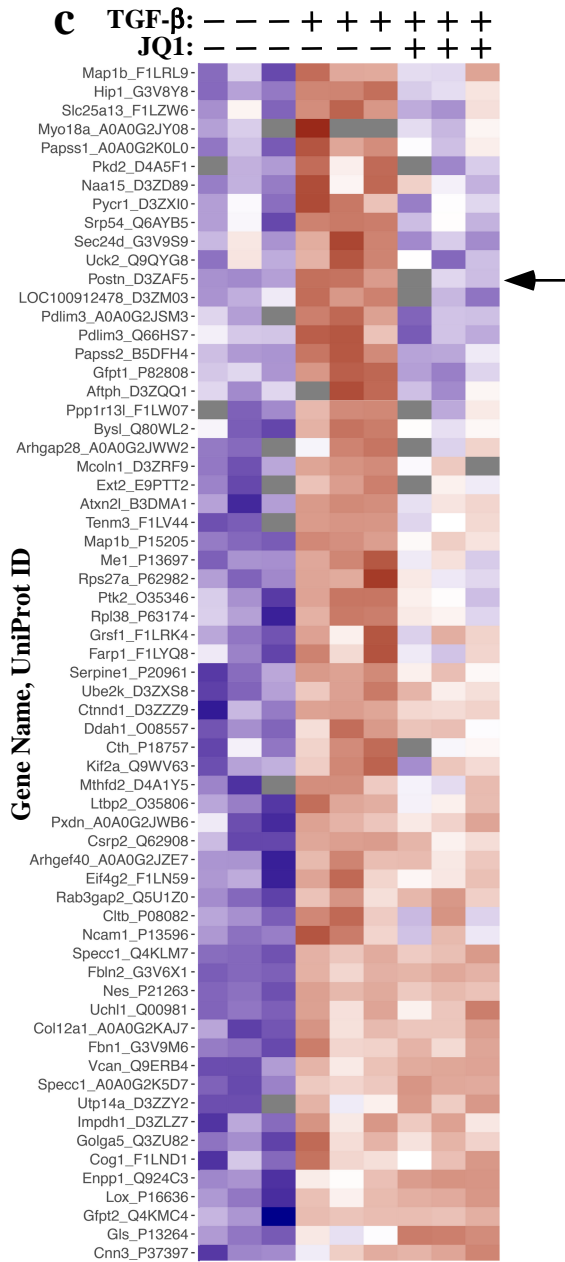

**sFigure 2**

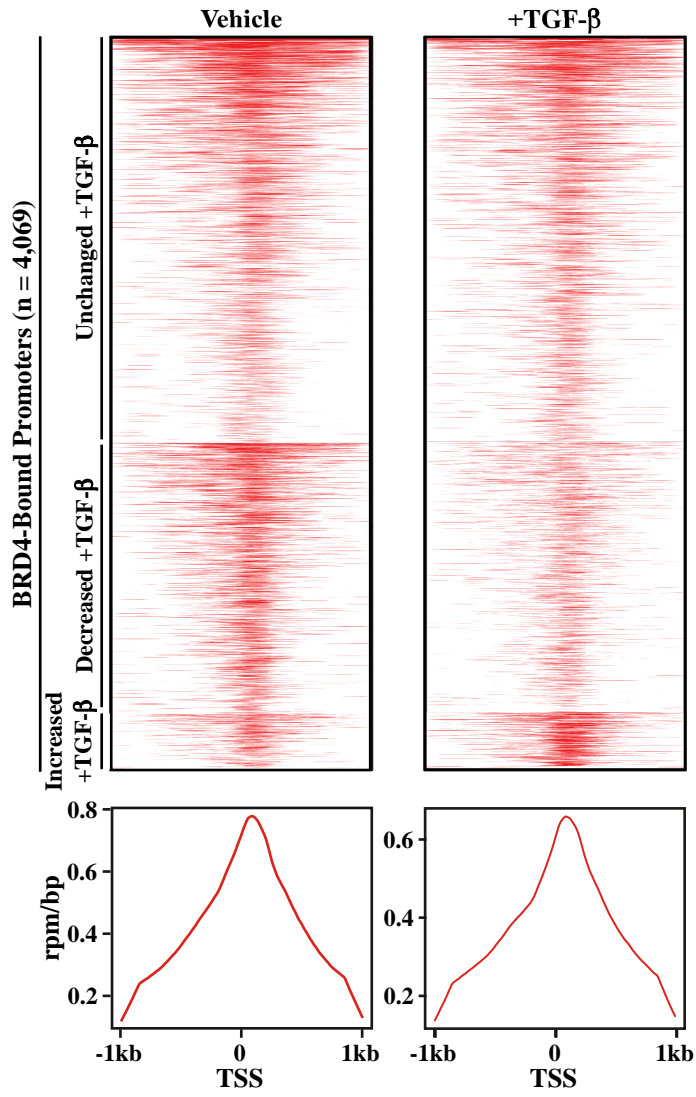

**Supplemental Table 1: Primers for qPCR**

| <b>Target</b>    | <b>5' oligo</b>        | <b>3' oligo</b>        |
|------------------|------------------------|------------------------|
| <i>Brd2</i>      | AGCACCAGGGAAAAGGATTC   | GATGCTTCCACAGAGCCTTC   |
| <i>Brd3</i>      | CTCCCCACCTGAGGTCT      | AGGCAGGTTTCAGCTTGATTG  |
| <i>Brd4</i>      | CCCTGGGACAAGATTGAGAA   | CTGCCTCTTGGGCTTGTTAG   |
| <i>B2M</i>       | TCACACCCACCGAGACCGATGT | TCTCGGTCCCAGGTGACGGTTT |
| <i>Sertad4</i>   | GGTAAGTTCTCCCACTTTCTCC | TGCCCAAACGATCTACTCATAC |
| <i>αSMA</i>      | GGAGATGGCGTGA CTACAA   | CGCTCAGCAGTAGTCACGAA   |
| <i>Periostin</i> | TCGTGGAACCAAAAATTAAGTC | CTTCGTCATTGCAGGTCCTT   |

**Supplemental Table 2: Primers for ChIP-qPCR**

| <b>Target</b>           | <b>5' oligo</b>        | <b>3' oligo</b>        |
|-------------------------|------------------------|------------------------|
| <i>Sertad4 Enh/SE 1</i> | CAAATGCTGGGAATCTGAACTG | TTAGGCCCTTCTGTCCTATCT  |
| <i>Sertad4 Enh/SE 2</i> | CCACTTCAGAGACAAGCTCTTT | CACAGACTAGGTTGAGCATTCC |
| <i>Sertad4 Enh 3</i>    | CACTACCGCCACTTACCTTTC  | GGCGACTTCTCTGAAACCAATA |
| <i>Sertad4 Enh 4</i>    | ACAGTGCCAGAGTCCAAAC    | CTCTGATGGTGCTGACCTATTT |
| <i>Sertad4 Enh 5</i>    | TTCGGGCATCCGTTCAA      | TGCTTGGAGCGCTTTCTTA    |
| <i>Sertad4 Enh 6</i>    | CAGGGCTGGAAGGAAAGTAAA  | CGAGGTTTATGGCGGGATTAG  |
| <i>Sertad4 TSS</i>      | CAGTGCCTCTCCTGAAGAATAA | GGCGTGTGTTTCCCATAGA    |
